# Supplementary material for: Electrolytic Mineralization of CO2
Source: Research Square preprint supplement (doi:10.21203/rs.3.rs-4002220/v1), 2024-03-04
Supplement: Supplementary file 1 [file 6cf7b713816bcc81b3e01eae.pdf]

# Supporting information for

## Electrolytic Mineralization of CO<sub>2</sub>

Gaopeng Jiang<sup>1</sup>, Douglas J.D. Pimlott<sup>1</sup>, Samuel J. Weiss<sup>1</sup>, Siwei Ma<sup>1</sup>, Christopher E. B. Waizenegger<sup>1</sup>, Yongwook Kim<sup>1</sup>, Yumeng Yang<sup>2</sup>, Tengxiao Ji<sup>1</sup>, Shaoxuan Ren<sup>1</sup>, and Curtis P.

Berlinguette<sup>1,2,3,4,\*</sup>

<sup>1</sup>Department of Chemistry, The University of British Columbia, 2036 Main Mall, Vancouver, British Columbia, V6T 1Z1, Canada.

<sup>2</sup>Department of Chemical and Biological Engineering, The University of British Columbia, 2360 East Mall, Vancouver, British Columbia, V6T 1Z3, Canada.

<sup>3</sup> Stewart Blusson Quantum Matter Institute, The University of British Columbia, 2355 East Mall, Vancouver, British Columbia, V6T 1Z4, Canada.

<sup>4</sup> Canadian Institute for Advanced Research (CIFAR), 661 University Avenue, Toronto, Ontario, M5G 1M1, Canada.

\*Corresponding author: Curtis P. Berlinguette ([cberling@chem.ubc.ca](mailto:cberling@chem.ubc.ca))

**The PDF file includes:**

Supplementary Calculation  
Supplementary Table 1  
Supplementary Figures 1 to 8  
References

## Supplementary Calculations.

For this section, we provide the reader with a glossary of terms and variables (Supplementary Table 1).

**Supplementary Table 1:** Glossary of terms and variables used to express metrics in this study.

| Variable                                  | Symbol                   | Meaning                                                                                                                                                                                                                                                                                                                                                      |
|-------------------------------------------|--------------------------|--------------------------------------------------------------------------------------------------------------------------------------------------------------------------------------------------------------------------------------------------------------------------------------------------------------------------------------------------------------|
| Calcium transference efficiency           | $\eta_{Ca, transfer}$    | $\eta_{Ca, transfer} = n_{Ca^{2+}, catholyte} / n_{Ca^{2+}, chemolyte} \times 100\%$ <p>Ratio of mol <math>Ca^{2+}_{(aq)}</math> ions in the catholyte, <math>n_{Ca^{2+}, catholyte}</math>, to mol <math>Ca^{2+}</math> liberated from silicates (e.g., <math>CaSiO_3</math>) in the chemical chamber, <math>n_{Ca^{2+}, chemolyte}</math>, times 100%.</p> |
| Calcium carbonation efficiency            | $\eta_{Ca, carbonation}$ | $\eta_{Ca, carbonation} = n_{CaCO_3} / n_{Ca^{2+}, chemolyte} \times 100\%$ <p>Ratio of number of moles of <math>CaCO_3</math> that precipitated in the cathode chamber after electrolysis, <math>n_{CaCO_3}</math> to <math>n_{Ca^{2+}, chemolyte}</math>, times 100%.</p>                                                                                  |
| CO <sub>2</sub> mineralization efficiency | $\eta_{mineralization}$  | $\eta_{mineralization} = n_{CaCO_3} / n_{CO_2} \times 100\%$ <p>Ratio between moles of <math>CaCO_3</math> that precipitated in the cathode chamber after electrolysis (<math>n_{CaCO_3}</math>), and the total moles of CO<sub>2</sub> purged into the cathode chamber during electrolysis (<math>n_{CO_2}</math>)</p>                                      |
| CO <sub>2</sub> mineralization rate       | $r$                      | <p>Tons of mineralized CO<sub>2</sub> per tons of silicate minerals per year, where <math>r_{CaSiO_3}</math> represents wollastonite (<math>CaSiO_3</math>), <math>r_{Mg_2SiO_4}</math> represents forsterite (<math>Mg_2SiO_4</math>).</p>                                                                                                                  |

|  |                                |                                                                                                                                                                          |
|--|--------------------------------|--------------------------------------------------------------------------------------------------------------------------------------------------------------------------|
|  | $n_{Ca^{2+}, chemolyte}$       | Moles of soluble $Ca^{2+}$ in the chemolyte sourced from solid $CaSiO_3$ .                                                                                               |
|  | $n_{CaCO_3}$                   | Moles of $CaCO_3$ that precipitated in the cathode chamber after electrolysis. This white solid is primarily $CaCO_3$ , but may contain trace quantities of $Ca(OH)_2$ . |
|  | $n_{Ca^{2+}, catholyte}$       | Moles of soluble $Ca^{2+}_{(aq)}$ ions in the catholyte.                                                                                                                 |
|  | $n_e^-$                        | Moles of electrons used for electrolysis.                                                                                                                                |
|  | $n_{CO_2}$                     | Moles of $CO_2$ purged into the catholyte during electrolysis.                                                                                                           |
|  | $m_{CaCO_3}$                   | Mass of $CaCO_3$ precipitated in the cathode chamber.                                                                                                                    |
|  | $m_{CO_2}$                     | Mass of $CO_2$ captured and converted into $CaCO_3$ in the weathering electrolyzer.                                                                                      |
|  | $m_{CaSiO_3}$                  | Mass of $CaSiO_3$ dissolved in the chemical chamber during electrolysis.                                                                                                 |
|  | $V_{catholyte}$                | Volume of catholyte for calcium transference efficiency determination test (i.e., 0.5 L).                                                                                |
|  | $V_{CO_2}$                     | Total volume of $CO_2$ purged into the catholyte during electrolysis.                                                                                                    |
|  | $V_m$                          | Molar volume at operating temperature (24.055 L mol <sup>-1</sup> at 20 °C).                                                                                             |
|  | $t$                            | Duration of electrolysis (i.e., 1 hour).                                                                                                                                 |
|  | $t_W$                          | Duration of weathering (i.e., 1 yr)                                                                                                                                      |
|  | $[Ca^{2+}_{(aq)}]_{chemolyte}$ | $Ca^{2+}$ concentration in the chemolyte at any point in time during electrolysis.                                                                                       |
|  | $[Ca^{2+}_{(aq)}]_{catholyte}$ | $Ca^{2+}$ concentration in the catholyte at any point in time during electrolysis.                                                                                       |

|  |                      |                                                                                         |
|--|----------------------|-----------------------------------------------------------------------------------------|
|  | $F$                  | Faraday constant: $96485 \text{ C mol}^{-1}$ ,<br>where $C = \text{A} \cdot \text{s}$ . |
|  | $i$                  | Applied current density<br>(i.e., $0.1 \text{ A cm}^{-2}$ ).                            |
|  | $k$                  | Slope of $[\text{Ca}^{2+}_{(\text{aq})}]$ versus time (see Fig. 2B).                    |
|  | $Q$                  | Flow rate of gas                                                                        |
|  | $SA$                 | Geometric surface area of electrodes<br>(i.e., $4 \text{ cm}^2$ ).                      |
|  | $\chi_{\text{CO}_2}$ | Molar fraction of $\text{CO}_2$ in the purged gas.                                      |

### Calcium transference efficiency ( $\eta_{Ca, transfer}$ )

We set out to quantify the amount of  $Ca^{2+}$  liberated from the silicate that passed through the  $Ca^{2+}$ -exchanged CEM into the catholyte. We define this term as the “calcium transference efficiency” ( $\eta_{Ca, transfer}$ ).

$$\eta_{Ca, transfer} = \frac{n_{Ca^{2+}, catholyte}}{n_{Ca^{2+}, chemolyte}} \times 100\%$$

where  $n_{Ca^{2+}, catholyte}$  was measured by ICP-OES, and it was determined indirectly from the  $Ca^{2+}$  concentration in the catholyte at any point in time during electrolysis (Fig. 2). The  $n_{Ca^{2+}, chemolyte}$  was calculated based on the number of moles of electrons used for electrolysis ( $n_{e^-}$ ) and Faraday's law.

$$n_{Ca^{2+}, catholyte} = [Ca_{(aq)}^{2+}]_{catholyte} \cdot V_{catholyte}$$

$$n_{Ca^{2+}, chemolyte} = \frac{n_{e^-}}{N} = \frac{it}{NF} SA$$

$$n_{Ca^{2+}, chemolyte} = \frac{n_{e^-}}{N} = \frac{iAt/F}{N}$$

where,  $i$  is the applied current density (i.e., 100 mA cm<sup>-2</sup>);  $SA$  is the geometric surface area of electrodes (i.e. 4 cm<sup>2</sup>);  $t$  is the duration of electrolysis (i.e. 1 h);  $F$  is Faraday constant (96485 C mol<sup>-1</sup>),  $N$  is the number of transferred electrons per dissolved  $Ca^{2+}$  (i.e., 2). The volume of catholyte for calcium transference efficiency determination test ( $V_{catholyte}$ , i.e. 0.5 L).

Substitution yields:

$$\eta_{Ca, transfer} = \frac{[Ca_{(aq)}^{2+}]_{catholyte}}{t} \frac{NFV_{catholyte}}{iSA} \times 100\%$$

The slope of  $[Ca^{2+}]$  versus time in Fig. 2,  $k$ , was expressed:

$$k = \frac{[Ca_{(aq)}^{2+}]_{catholyte}}{t}$$

Thus, substitution yields:

$$\eta_{Ca, transfer} = k \frac{NFV_{catholyte}}{i SA} \times 100\%$$

*Sample calculation:*

The slope obtained from Fig. 2 is 0.246 mmol L<sup>-1</sup> min<sup>-1</sup>, or 4.10 × 10<sup>-6</sup> mol L<sup>-1</sup> s<sup>-1</sup> in SI units.

$$\begin{aligned} \eta_{Ca, transfer} &= k \frac{NFV_{catholyte}}{i SA} \times 100\% \\ &= 4.10 \times 10^{-6} \text{ mol L}^{-1} \text{ s}^{-1} \times \frac{0.5 \text{ L} \times 2 \times 96485 \text{ C mol}^{-1}}{0.1 \text{ A cm}^{-2} \times 4 \text{ cm}^2} \times 100\% \\ &= 4.10 \times 10^{-6} \text{ mol L}^{-1} \text{ s}^{-1} \times 2.41 \times 10^5 \frac{\text{L (A s) mol}^{-1}}{\text{A}} \times 100\% = 98.9\% \end{aligned}$$

This high calcium transference efficiency shows effectively quantitative permeance of dissolved Ca<sup>2+</sup> through the Ca-CEM into the cathode chamber. We note that in order to determine  $\eta_{Ca, transfer}$ , we performed electrolysis without supplying any CO<sub>2</sub> supplied to the cathode, and ensured that all of the Ca<sup>2+</sup> that passed through the membrane remained soluble in the catholyte by adding 20 mM of ethylenediaminetetracetic acid disodium (EDTA-2Na, Sigma Aldrich) the catholyte, and using a larger catholyte recirculating volume of 500 mL. During electrolysis, 2 mL of chemolyte and catholyte were taken out by a syringe at variable time periods and filtered with a member filter unit (Millipore, 0.22 μm). A volume of 1 mL of the filtered solutions were diluted with 3% nitric acid (10 times for catholyte and 100 times for chemolyte). The acidic dilute solutions were tested by inductively coupled plasma optical emission spectroscopy (ICP-OES) to determine [Ca<sup>2+</sup><sub>(aq)</sub>].

### Calcium carbonation efficiency ( $\eta_{Ca, carbonation}$ )

We define the calcium carbonation efficiency ( $\eta_{Ca, carbonation}$ ) as:

$$\eta_{Ca, carbonation} (\%) = \frac{n_{CaCO_3}}{n_{Ca^{2+}, chemolyte}} \times 100\%$$

where  $n_{CaCO_3}$  was calculated using the following equation.

$$n_{CaCO_3} = \frac{m_{CaCO_3}}{M_{CaCO_3}}$$

where  $m_{CaCO_3}$  is the mass of  $CaCO_3$  that precipitated in the cathode chamber after electrolysis and  $M_{CaCO_3}$  is the molar mass of  $CaCO_3$ . Substitution yields:

$$\eta_{Ca, carbonation} (\%) = \frac{\frac{m_{CaCO_3}}{M_{CaCO_3}}}{\frac{it}{NF} SA} \times 100\% = \frac{NFm_{CaCO_3}}{it SA M_{CaCO_3}} \times 100\%$$

*Sample calculation:*

For example, when simulated flue gas was purged into the catholyte over 1 h of electrolysis, the obtained  $CaCO_3$  in the cathode chamber was 0.4992 g. Thus,  $\eta_{Ca, carbonation}$  can be calculated as follows:

$$\begin{aligned} \eta_{Ca, carbonation} (\%) &= \frac{NFm_{CaCO_3}}{it SA M_{CaCO_3}} \times 100\% \\ &= \frac{2 \times 96485 \text{ C mol}^{-1} \times 0.4992 \text{ g}}{0.1 \text{ A cm}^{-2} \times 4 \text{ cm}^2 \times 1 \text{ h} \times 100.09 \text{ g mol}^{-1}} = \frac{2 \times 96485 \text{ A s mol}^{-1} \times 0.4992 \text{ g}}{0.4 \text{ A} \times 3600 \text{ s} \times 100.09 \text{ g mol}^{-1}} \\ &= \frac{96330 \text{ A s g mol}^{-1}}{144130 \text{ A s g mol}^{-1}} \times 100\% = 67\% \end{aligned}$$



### CO<sub>2</sub> mineralization efficiency ( $\eta_{\text{mineralization}}$ )

We define the CO<sub>2</sub> mineralization efficiency as:

$$\eta_{\text{mineralization}} (\%) = \frac{n_{\text{CaCO}_3}}{n_{\text{CO}_2}} \times 100\%$$

The  $n_{\text{CO}_2}$  is calculated on the basis of the total volume of CO<sub>2</sub> purged into the catholyte during electrolysis ( $V_{\text{CO}_2}$ ) and the molar volume at operating temperature ( $V_m$ ), which is calculated as 24.055 L mol<sup>-1</sup> at 20 °C.

$$n_{\text{CO}_2} = \frac{V_{\text{CO}_2}}{V_m} = \frac{\chi_{\text{CO}_2} Q t}{V_m}$$

where  $\chi_{\text{CO}_2}$  is a molar fraction of CO<sub>2</sub> in the purged gas (i.e., 0.04% for air and 10% for flue gas);  $Q$  is the flow rate of gas. Substitution yields:

$$\eta_{\text{mineralization}} (\%) = \frac{m_{\text{CaCO}_3} V_m}{\chi_{\text{CO}_2} Q t M_{\text{CaCO}_3}} \times 100\%$$

*Sample calculation:*

For example, with 0.2 L min<sup>-1</sup> simulated flue gas (10% CO<sub>2</sub>) flowing into catholyte, we collected 0.4992 g CaCO<sub>3</sub> in the cathode chamber and we calculated  $\eta_{\text{mineralization}}$ .

$$\begin{aligned} \eta_{\text{mineralization}} (\%) &= \frac{m_{\text{CaCO}_3} V_m}{\chi_{\text{CO}_2} Q t M_{\text{CaCO}_3}} \times 100\% \\ &= \frac{0.4992 \text{ g} \times 24.055 \text{ L mol}^{-1}}{10\% \times 0.2 \text{ L min}^{-1} \times 1 \text{ h} \times 100.09 \text{ g mol}^{-1}} = \frac{0.4992 \text{ g} \times 24.055 \text{ L mol}^{-1}}{10\% \times 0.2 \text{ L min}^{-1} \times 60 \text{ min} \times 100.09 \text{ g mol}^{-1}} \end{aligned}$$

$$= \frac{12.008 \text{ g L mol}^{-1}}{120.108 \text{ L g mol}^{-1}} \times 100\% = 10\%$$

### **CO<sub>2</sub> mineralization rate of natural rock weathering**

It has been estimated that 0.127 Gt of CO<sub>2</sub> is removed annually by the natural weathering of silicates.<sup>1</sup> For this exercise, we assumed that all of this CO<sub>2</sub> is mineralized by a single silicate mineral, either wollastonite (CaSiO<sub>3</sub>) or forsterite (Mg<sub>2</sub>SiO<sub>4</sub>). We can then express the CO<sub>2</sub> mineralization rate of natural weathering by the mass of CO<sub>2</sub> being mineralized to the mass of silicate minerals per year.

For example, the natural weathering of CaSiO<sub>3</sub> is expressed as.

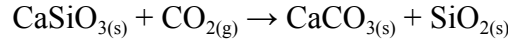

Thus, the CO<sub>2</sub> mineralization rate of natural weathering with wollastonite ( $r_{\text{CaSiO}_3}$ ) can be calculated as follows:

$$r_{\text{CaSiO}_3} = \frac{m_{\text{CO}_2, W}}{m_{\text{CaSiO}_3, W} t_W} = \frac{m_{\text{CO}_2, W}}{m_{\text{CO}_2, W} t_W \frac{N_{\text{CaSiO}_3/\text{CO}_2} M_{\text{CaSiO}_3}}{M_{\text{CO}_2}}} = \frac{M_{\text{CO}_2}}{M_{\text{CaSiO}_3} N_{\text{CaSiO}_3/\text{CO}_2} t_W}$$

where  $m_{\text{CO}_2, W}$  is the mass of CO<sub>2</sub> removed per year through natural weathering (0.127 Gt),  $m_{\text{CaSiO}_3, W}$  is the mass of wollastonite needed to remove all this CO<sub>2</sub> through natural weathering (i.e., 0.335 Gt);  $t_W$  is the duration of weathering (i.e., 1 yr);  $M_{\text{CO}_2}$  and  $M_{\text{CaSiO}_3}$  are the molar masses of CO<sub>2</sub> (44.01 g mol<sup>-1</sup>) and CaSiO<sub>3</sub> (116.16 g mol<sup>-1</sup>), respectively;  $N_{\text{CaSiO}_3/\text{CO}_2}$  is the stoichiometric ratio of Ca to CO<sub>2</sub> (i.e., 1).

Using these assumptions, the CO<sub>2</sub> mineralization rate of natural weathering with wollastonite is estimated as follows:

$$r_{CaSiO_3} = \frac{M_{CO_2}}{M_{CaSiO_3} N_{CaSiO_3/CO_2} t_W} = \frac{44.01 \text{ g mol}^{-1}}{116.16 \text{ g mol}^{-1} \times 1 \times 1 \text{ yr}}$$

$$= 0.379 \text{ g}_{CO_2} \text{ g}_{CaSiO_3}^{-1} \text{ yr}^{-1} = 0.379 \text{ ton}_{CO_2} \text{ ton}_{CaSiO_3}^{-1} \text{ yr}^{-1}$$

The same procedure can be used to estimate the CO<sub>2</sub> mineralization rate of natural weathering with forsterite ( $r_{Mg_2SiO_4}$ ).

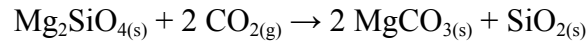

$$r_{Mg_2SiO_4} = \frac{m_{CO_2, W}}{m_{Mg_2SiO_4, W} t_W} = \frac{m_{CO_2, W}}{m_{CO_2, W} \frac{N_{Mg_2SiO_4/CO_2} M_{Mg_2SiO_4}}{M_{CO_2}}} = \frac{M_{CO_2}}{M_{Mg_2SiO_4} N_{Mg_2SiO_4/CO_2} t_W}$$

where  $m_{Mg_2SiO_4, W}$  is the mass of forsterite needed to remove all this CO<sub>2</sub> through natural weathering, i.e. 0.203 Gt;  $M_{Mg_2SiO_4}$  the molar mass of Mg<sub>2</sub>SiO<sub>4</sub> (140.69 g mol<sup>-1</sup>);  $N_{Mg_2SiO_4/CO_2}$  is the stoichiometric ratio of Mg<sub>2</sub>SiO<sub>4</sub> to CO<sub>2</sub> (i.e., 0.5).

Using these assumptions,  $r_{Mg_2SiO_4}$  is estimated as follows:

$$r_{Mg_2SiO_4} = \frac{M_{CO_2}}{M_{Mg_2SiO_4} N_{Mg_2SiO_4/CO_2} t_W} = \frac{44.01 \text{ g mol}^{-1}}{140.69 \text{ g mol}^{-1} \times 0.5 \times 1 \text{ yr}}$$

$$= 0.626 \text{ g}_{CO_2} \text{ g}_{Mg_2SiO_4}^{-1} \text{ yr}^{-1} = 0.626 \text{ ton}_{CO_2} \text{ ton}_{Mg_2SiO_4}^{-1} \text{ yr}^{-1}$$

### CO<sub>2</sub> mineralization rate of weathering electrolyzer

Our study centered on CaSiO<sub>3</sub>, and thus the weathering reaction for wollastonite was used to calculate the CO<sub>2</sub> mineralization rate of our electrolyzer, i.e.,  $r_{CaSiO_3}$ . We take the calculation of  $r_{CaSiO_3}$  for our weathering electrolyser purged with simulated flue gas as an example.

Given that 0.4992 g of CaCO<sub>3</sub> precipitated in the cathode chamber, the mass of CO<sub>2</sub> captured and converted into CaCO<sub>3</sub> in the weathering electrolyzer ( $m_{CO_2}$ ) was calculated based on the following equation,

$$m_{CO_2} = \frac{m_{CaCO_3} M_{CO_2}}{N_{CaCO_3/CO_2} M_{CaCO_3}}$$
$$m_{CO_2} = \frac{0.4992 \text{ g} \times 44.01 \text{ g mol}^{-1}}{1 \times 100.09 \text{ g mol}^{-1}} = 0.2195 \text{ g}_{CO_2}$$

where  $N_{CaCO_3/CO_2}$  is the stoichiometric ratio of CaCO<sub>3</sub> to CO<sub>2</sub> (i.e., 1).

Then, the mass of dissolved CaSiO<sub>3</sub> during electrolysis ( $m_{CaSiO_3}$ ) was calculated in the following equation.

$$m_{CaSiO_3} = \frac{it \text{ } SA \text{ } M_{CaSiO_3}}{N_{e/CaSiO_3} F}$$
$$m_{CaSiO_3} = \frac{0.1 \text{ A cm}^{-2} \times 4 \text{ cm}^2 \times 1 \text{ h} \times 116.16 \text{ g mol}^{-1}}{2 \times 96485 \text{ C mol}^{-1}} = \frac{0.4 \text{ A} \times 3600 \text{ s} \times 116.16 \text{ g mol}^{-1}}{2 \times 96485 \text{ A s mol}^{-1}}$$
$$= \frac{167270 \text{ A s g mol}^{-1}}{192970 \text{ A s mol}^{-1}} = 0.8668 \text{ g}_{CaSiO_3}$$

where  $N_{e/CaSiO_3}$  is the stoichiometric ratio of electrons to CaSiO<sub>3</sub> in Fig. 1 (i.e., 2).

Thus, the CO<sub>2</sub> mineralization rate of our weathering electrolyser over 1 hour of electrolysis was calculated as follows:

$$r_{CaSiO_3} = \frac{m_{CO_2}}{m_{CaSiO_3} t}$$

$$r_{CaSiO_3} = \frac{0.2195 g_{CO_2}}{0.8668 g_{CaSiO_3} \times 1 h} = 0.2532 g_{CO_2} g_{CaSiO_3}^{-1} h^{-1}$$

Lastly, to compare to natural weathering, we calculate the yearly CO<sub>2</sub> mineralization rate of our weathering electrolyzer operating at current density of 100 mA cm<sup>-2</sup> with simulated flue gas (10% CO<sub>2</sub>) purging into catholyte:

$$r_{CaSiO_3} = \frac{0.2532 g_{CO_2}}{g_{CaSiO_3} h} \times \frac{24 \times 365 h}{yr}$$

$$= 2218 g_{CO_2} g_{CaSiO_3}^{-1} yr^{-1} = 2218 ton_{CO_2} ton_{CaSiO_3}^{-1} yr^{-1}$$

Similarly, the CO<sub>2</sub> mineralization rate of our weathering electrolyser using CaSiO<sub>3</sub> and purging with ambient air is calculated to be 69.32 ton<sub>CO<sub>2</sub></sub> ton<sub>CaSiO<sub>3</sub></sub><sup>-1</sup> yr<sup>-1</sup>.

## Supplementary Figures

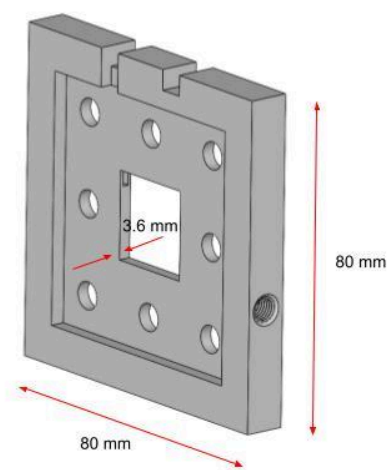

**Supplementary Figure 1:** Dimensions of the 3D-printed chemical chamber.

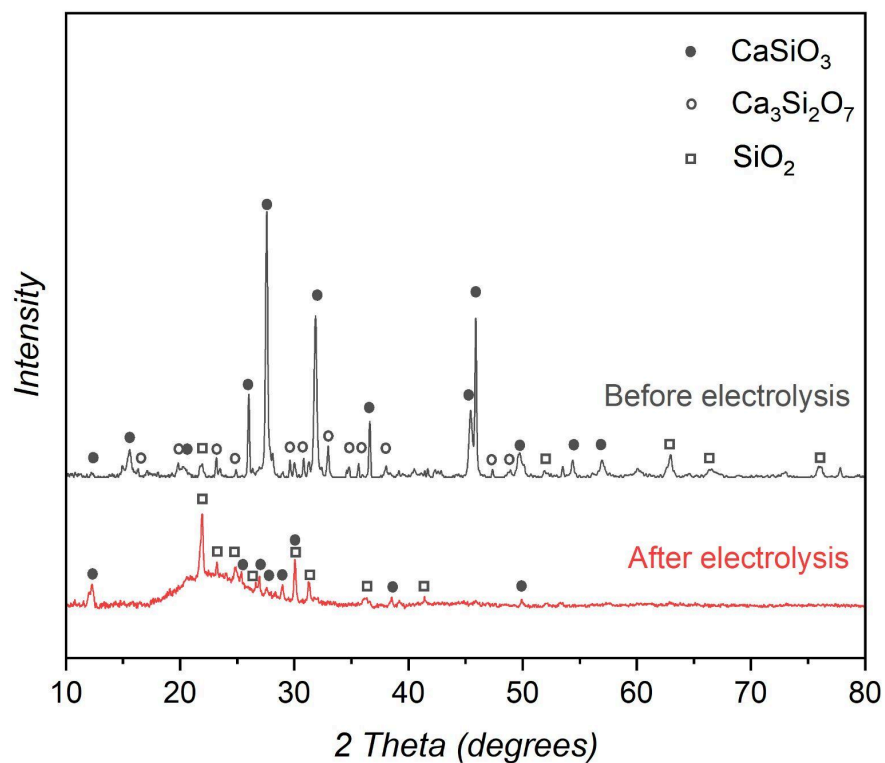

**Supplementary Figure 2:** XRD diffractograms of  $\text{CaSiO}_3$  introduced into the chemical chamber before electrolysis,<sup>2,3</sup> and the solids collected in the chemical chamber after 1 hour of electrolysis. Note that the  $\text{CaSiO}_3$  signals are less prominent after electrolysis, and the onset of the broad signal at 25 degrees is consistent with amorphous  $\text{SiO}_2$ .<sup>4-6</sup>

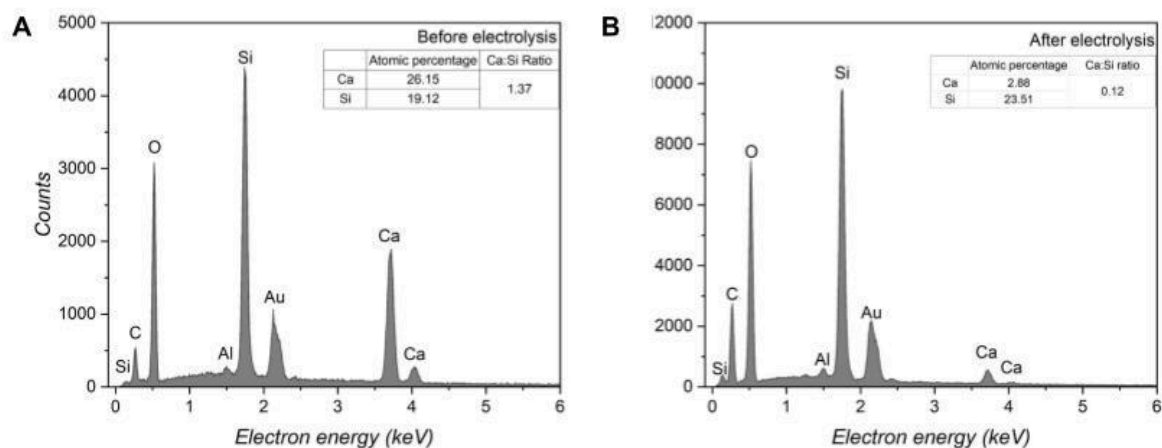

**Supplementary Figure 3:** EDX spectra of commercial  $\text{CaSiO}_3$  (**A**) before and (**B**) after 60 minutes electrolysis. Gold sputtering was applied for SEM sample preparation. The detection of carbon and aluminum was assigned to conductive tape and aluminum sample stab.



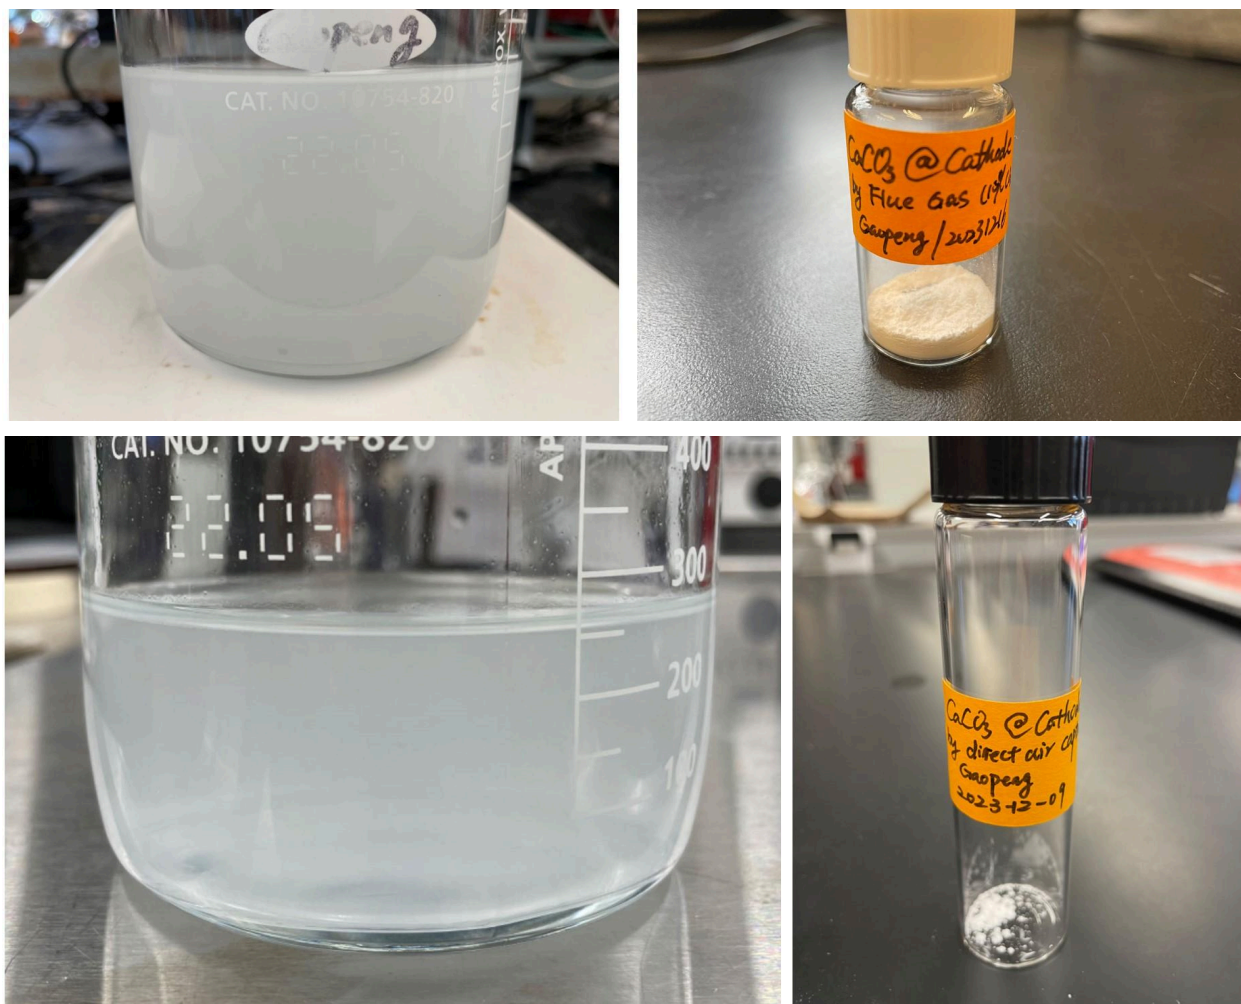

**Supplementary Figure 4:** Photographs of the catholyte (left) and CaCO<sub>3</sub> solid (right) after electrolysis at 100 mA cm<sup>-2</sup> in the presence of the simulated flue gas (10% CO<sub>2</sub>, 90 % N<sub>2</sub>) (top panel), and air (bottom panel).

**A**

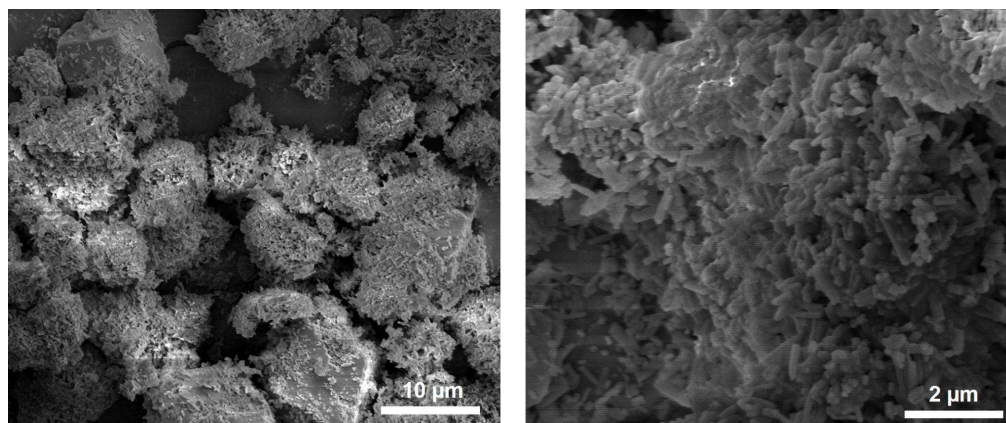

**B**

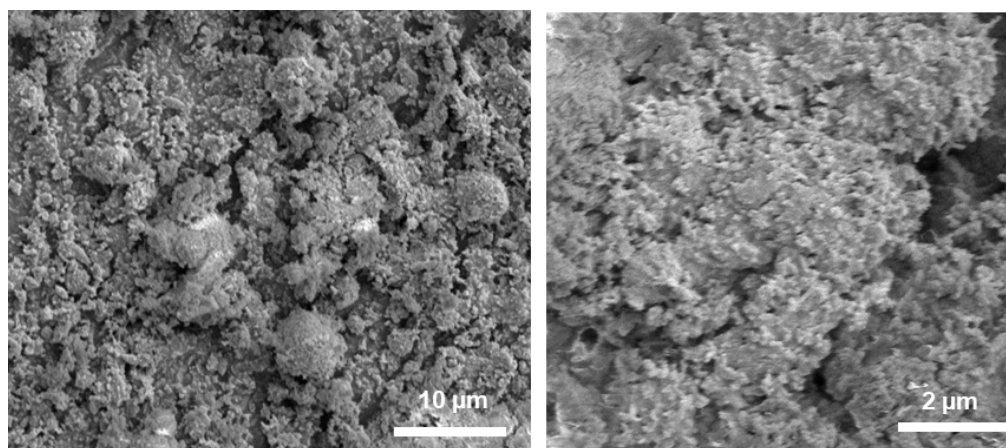

**Supplementary Figure 5:** SEM images of white solid recorded from the cathode chamber after electrolysis at 100 mA cm<sup>-2</sup> in the presence of (a) simulated flue gas (10% CO<sub>2</sub>, 90 % N<sub>2</sub>) and (b) ambient air.

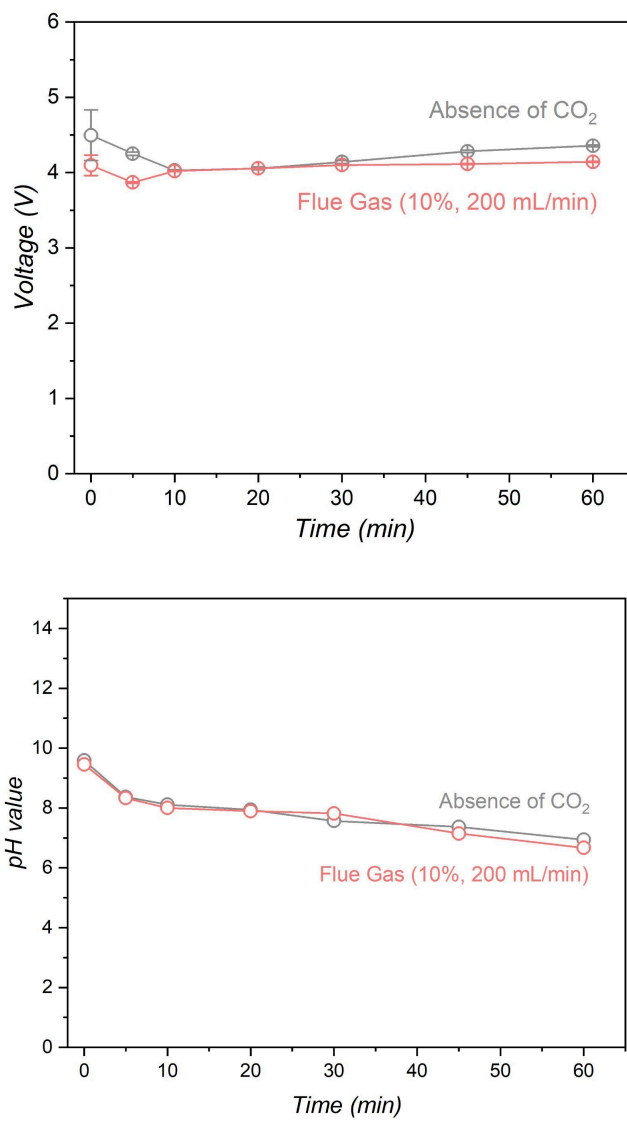

**Supplementary Figure 6:** Cell voltage (top) and catholyte pH (bottom) versus time for electrolysis at  $100 \text{ mA cm}^{-2}$  without a  $\text{CO}_2$  supply, in the presence of the simulated flue gas (10%  $\text{CO}_2$ , 90 %  $\text{N}_2$ ).

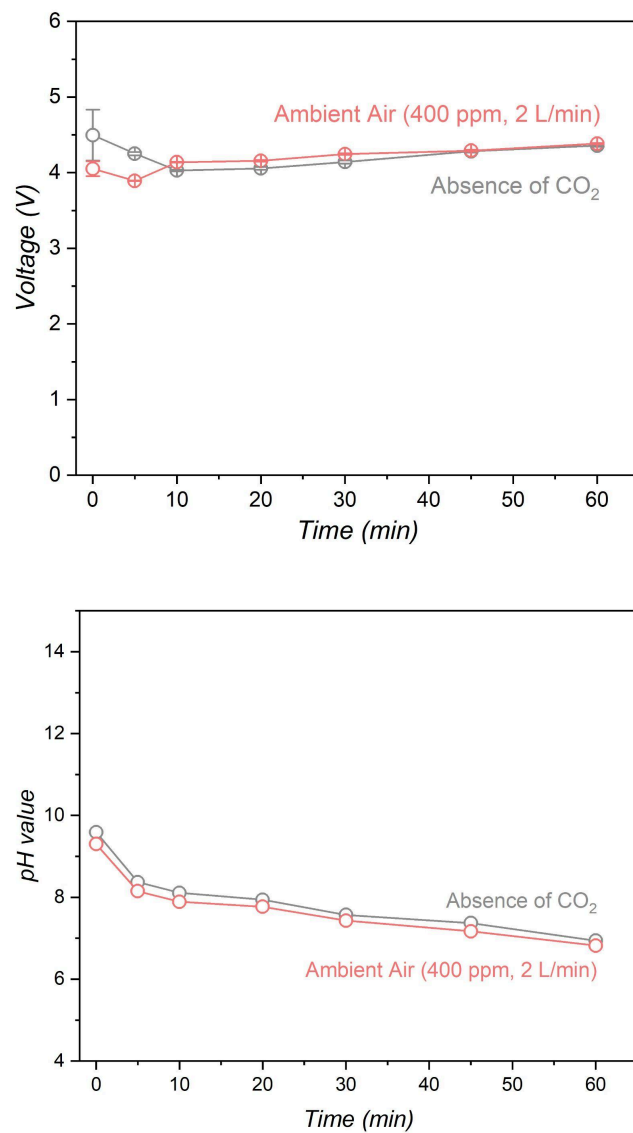

**Supplementary Figure 7:** Cell voltage (top) and catholyte pH (bottom) versus time for electrolysis at  $100 \text{ mA cm}^{-2}$  with and without a  $\text{CO}_2$  supply, in the form of air.

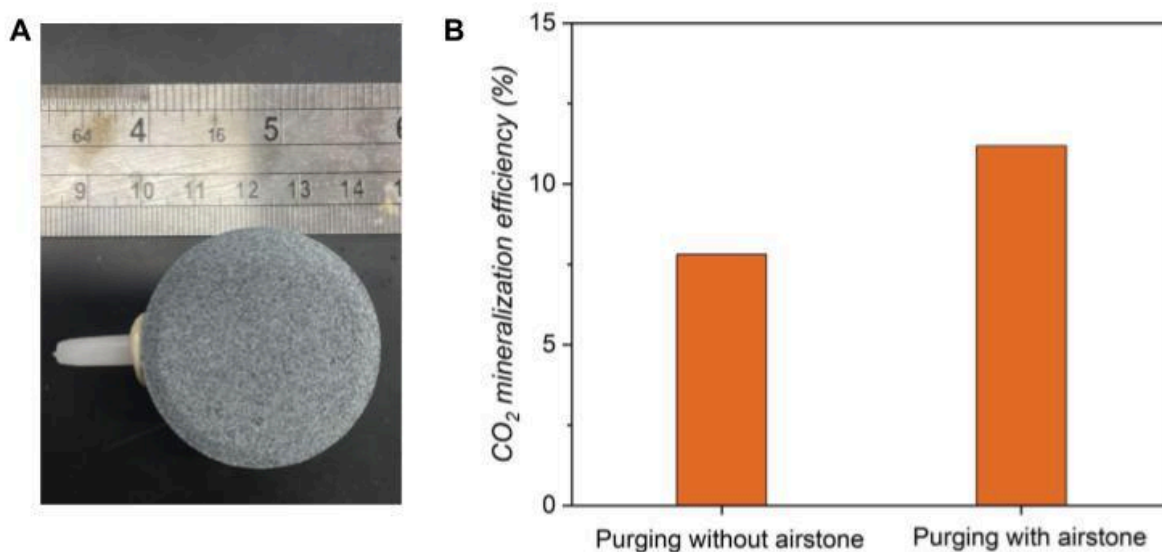

**Supplementary Figure 8:** (A) The commercial airstone (diameter = 4 cm) used to purge ambient air. (B) The CO<sub>2</sub> mineralization efficiency of the weathering electrolyzer at 100 mA cm<sup>-2</sup> supplied with air, with and without the airstone.

## References

1. Sanna, A., Hall, M. R. & Maroto-Valer, M. Post-processing pathways in carbon capture and storage by mineral carbonation (CCSM) towards the introduction of carbon neutral materials. *Energy Environ. Sci.* **5**, 7781–7796 (2012).
2. Zhao, H., Park, Y., Lee, D. H. & Park, A.-H. A. Tuning the dissolution kinetics of wollastonite via chelating agents for CO<sub>2</sub> sequestration with integrated synthesis of precipitated calcium carbonates. *Phys. Chem. Chem. Phys.* **15**, 15185–15192 (2013).
3. Monasterio-Guillot, L., Di Lorenzo, F., Ruiz-Agudo, E. & Rodriguez-Navarro, C. Reaction of pseudowollastonite with carbonate-bearing fluids: implications for CO<sub>2</sub> mineral sequestration. *Chem. Geol.* **524**, 158–173 (2019).
4. Yu, L. Y., Huang, Z. X. & Shi, M. X. Synthesis and characterization of silica by sol-gel method. *Adv. Mat. Res.* **1030**, 189–192 (2014).
5. Guo, Q. *et al.* Synthesis of dispersed amorphous SiO<sub>2</sub> nanoparticles via sol–gel process. *Ceram. Int.* **43**, 192–196 (2017).
6. Biswas, R. K. *et al.* Study of short range structure of amorphous silica from PDF using Ag radiation in laboratory XRD system, Raman and NEXAFS. *J. Non-Cryst. Solids* **488**, 1–9 (2018).
